# Supplementary material
Source: PubMed Central journal article supplement (PMC8117768)
Supplement: AEM.03109-20-s0001.pdf [file AEM.03109-20-s0001.pdf]

**Table S1. Cytochromes discussed in this article.**

| Gene     | Protein          | Location            | Note                                                                                              |
|----------|------------------|---------------------|---------------------------------------------------------------------------------------------------|
| GSU0274  | CbcI, CbcY, CbcL | Inner membrane      | <i>b-/c</i> -Type fusion cytochrome, Low redox potential pathway                                  |
| GSU0592  | CbcC             | Inner membrane      | <i>c</i> -Type cytochrome for Cbc5 complex, Fe(III) oxide                                         |
| GSU3259  | ImcH             | Inner membrane      | High redox potential pathway                                                                      |
| GSU0466  | MacA             | Inner membrane      | Regulator for OmcB expression                                                                     |
| GSU0612  | PpcA             | Periplasm           | Major in the PpcA family, Fe(III), U(VI), AQDS                                                    |
| GSU0364  | PpcB             | Periplasm           | Homolog of PpcA                                                                                   |
| GSU0365  | PpcC             | Periplasm           | Homolog of PpcA                                                                                   |
| GSU1024  | PpcD             | Periplasm           | Homolog of PpcA                                                                                   |
| GSU1760  | PpcE             | Periplasm           | Homolog of PpcA                                                                                   |
| GSU3274  | PccH             | Periplasm           | Mono-heme, Cathode                                                                                |
| GSU2515  |                  | Periplasm           | Electron transfer partner for PccH?                                                               |
| GSU2737  | OmcB             | Outer membrane      | Pcc complex, Fe(III)                                                                              |
| GSU2738  | OmaB             | Periplasm           | Pcc complex with OmcB                                                                             |
| GSU2731  | OmcC             | Outer membrane      | Pcc complex, Homolog of OmcB                                                                      |
| GSU2732  | OmaC             | Periplasm           | Pcc complex with OmcC                                                                             |
| GSU2642  | OmcW, ExtD       | Outer membrane      | Pcc complex, Anode                                                                                |
| GSU2643  | ExtC             | Periplasm           | Pcc complex with ExtD                                                                             |
| GSU2645  | ExtA             | Periplasm           | Pcc complex with ExtD                                                                             |
| GSU2724  | OmcV, ExtG       | Outer membrane      | Pcc complex, Fe(III) oxide                                                                        |
| GSU2725  | ExtF             | Periplasm           | Pcc complex with ExtG                                                                             |
| GSU2504  | OmcS             | Outer membrane      | Association with e-pili, Filament formation, Fe(III) oxide, Fe(0), DIET                           |
| GSU2076  | OmcZ             | Outer membrane      | Biofilm-anode interface, Filament formation, Anode, Fe(0)                                         |
| GSU2503  | OmcT             | Outer membrane      | Homolog of OmcS                                                                                   |
| GSU0618  | OmcE             | Outer membrane      | One of the most abundant <i>c</i> -type cytochromes among sheared proteins                        |
| GSU2432  | OmcF             | Outer membrane      | Mono-heme, Regulator for OmcB expression                                                          |
| GSU2882  | OmcG             | Outer membrane      | Regulator for OmcB expression                                                                     |
| GSU2883  | OmcH             | Outer membrane      | Regulator for OmcB expression                                                                     |
| GSU1761  | PgcA             | Extracellular space | Induced by adaptive evolution for Fe(III) oxide                                                   |
| Gbem3371 | GscA             | Outer membrane      | <i>G. bemidjiensis</i> homolog of the cytochrome in uranium bioremediation<br>Substitute for OmcS |

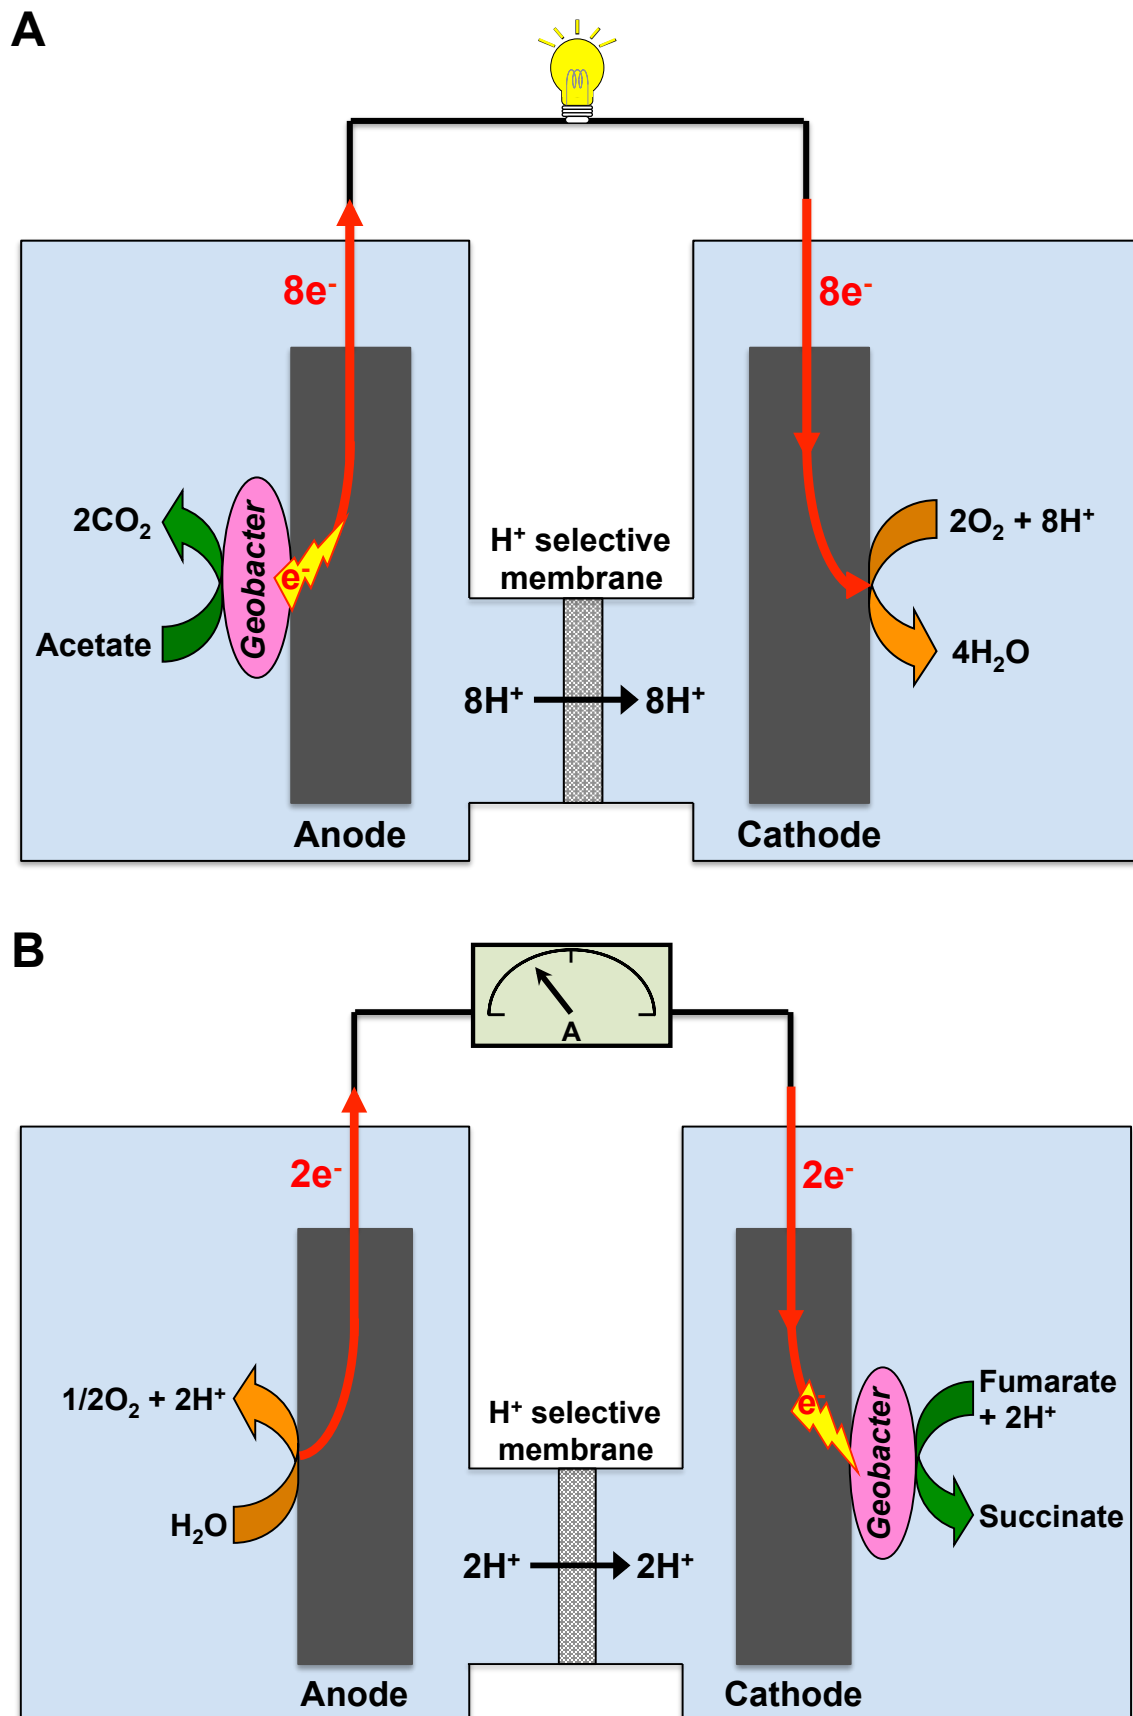

**Figure S1. Schematic presentation of two-chambered H-cell bioelectrochemical devices.**  
 (A) Anode as the electron acceptor (current production).  
 (B) Cathode as the electron donor (current consumption).
